# Supplementary material for: Concentration of Macroelements and Trace Elements in Farmed Fallow Deer Antlers Depending on Age
Source: MDPI journal article supplement (doi:10.3390/ani12233409), 2022-12-03
Supplement: s1 [file s1]

**Table S1.** Composition of Josera Phosphoreimer multi-ingredient licks (Josera, Poland)

| <b>Components</b>                            |      | <b>Content (per 1 kg)</b> |
|----------------------------------------------|------|---------------------------|
| Ca                                           | %    | 5.00                      |
| P                                            | %    | 10.00                     |
| Na                                           | %    | 7.00                      |
| Mg                                           | %    | 7.50                      |
| Ca / P                                       |      | 0.5:1                     |
| Vitamin A                                    | j.m. | 650 000.00                |
| Vitamin D3                                   | j.m. | 120 000.00                |
| Vitamin E                                    | mg   | 1 500.00                  |
| Zn (as zinc oxide)                           | mg   | 8 000.00                  |
| Mn (as manganese chelate of glycine hydrate) | mg   | 4 000.00                  |
| Mn (as manganese (II) oxide)                 | mg   | 4 000.00                  |
| Cu (as copper sulphate pentahydrate)         | mg   | 1 200.00                  |
| I                                            | mg   | 100.00                    |
| Co                                           | mg   | 22.00                     |
| Se (as sodium selenite)                      | mg   | 40.00                     |
